# Supplementary material for: Plasma Phospholipid Fatty Acids, FADS1 and Risk of 15 Cardiovascular Diseases: A Mendelian Randomisation Study
Source: PubMed Central journal article supplement (PMC6950527; doi:10.3390/nu11123001), 2019-12-07
Supplement: nutrients-11-03001-s001.pdf [file nutrients-11-03001-s001.pdf]

**Supplementary Table 1. Information of included studies and consortia**

| Exposure/Outcome                                         | Consortium or cohort study                    | Participants                                                                                                                                                                                                                    | Web source if publicly available                                           |
|----------------------------------------------------------|-----------------------------------------------|---------------------------------------------------------------------------------------------------------------------------------------------------------------------------------------------------------------------------------|----------------------------------------------------------------------------|
| n-3 PUFAs                                                | ARIC, CHS, CARDIA, InCHIANTI and MESA studies | 8866 individuals of European ancestry                                                                                                                                                                                           | Not available                                                              |
| n-6 PUFAs                                                | ARIC, CHS, CARDIA, InCHIANTI and MESA studies | 8631 individuals of European ancestry                                                                                                                                                                                           | Not available                                                              |
| n-7 MUFA, n-9 MUFA and SFA                               | ARIC, CHS, CARDIA, InCHIANTI and MESA studies | 8961 individuals of European ancestry                                                                                                                                                                                           | Not available                                                              |
| Coronary artery disease                                  | CARDIoGRAMplusC4D consortium                  | 184 305 individuals (60 801 coronary artery disease cases and 123 504 non-cases) of mainly European (77%) and Asian (19%) ancestry                                                                                              | <a href="http://www.cardiogramplusc4d.org/">www.cardiogramplusc4d.org/</a> |
| Atrial fibrillation                                      | Atrial Fibrillation Consortium                | 588 190 individuals (65 446 atrial fibrillation cases and 522 744 non-cases) of mainly European (91%) and Asian (6%) ancestry                                                                                                   | <a href="http://www.broadcvdi.org">http://www.broadcvdi.org</a>            |
| Ischemic stroke and subtypes                             | MEGASTROKE consortium                         | 514 791 individuals (60 341 ischemic stroke cases and 454 450 non-cases) of mainly European (86%) and Asian (9%) ancestry; 6688 large artery stroke cases, 11 710 small vessel stroke cases and 9006 cardioembolic stroke cases | <a href="http://www.megastroke.org/">http://www.megastroke.org/</a>        |
| Nine cardiovascular diseases (see Supplementary Table 3) | UK Biobank                                    | 367 643 unrelated European-descent individuals                                                                                                                                                                                  | <a href="https://www.ukbiobank.ac.uk/">https://www.ukbiobank.ac.uk/</a>    |

ARIC indicates Atherosclerosis in Risk in Communities; CARDIA, Coronary Artery Risk Development in Young Adults; CHS, Cardiovascular Health Study; InCHIANTI, Invecchiare in Chianti; MESA, Multi-Ethnic Study of Atherosclerosis; MUFA, monounsaturated fatty acid; PUFA, polyunsaturated fatty acids; SFA, saturated fatty acid.

**Supplementary Table 2. Definitions and sources of information for CAD, AF and ischemic stroke and its subtypes from consortia**

| Outcome | Consortium                     | Cases  | Non-cases | Case definition                                                                                                                                               | Source                                                                          |
|---------|--------------------------------|--------|-----------|---------------------------------------------------------------------------------------------------------------------------------------------------------------|---------------------------------------------------------------------------------|
| CAD     | CARDIoGRAMplusC4D              | 60 801 | 123 504   | Case status was defined by an inclusive CAD diagnosis (e.g. myocardial infarction, acute coronary syndrome, chronic stable angina, or coronary stenosis >50%) | <a href="http://www.cardiogramplusc4d.org">http://www.cardiogramplusc4d.org</a> |
| AF      | Atrial Fibrillation Consortium | 65 446 | 522 744   | AF was defined as paroxysmal or permanent AF or atrial flutter                                                                                                | <a href="http://www.broadcvdi.org">www.broadcvdi.org</a>                        |
| AIS     | MEGASTROKE                     | 60 341 | 454 450   | The classification of subtypes was mainly based on the Trial of Org 10172 in Acute Stroke Treatment (TOAST) criteria                                          | <a href="http://www.megastroke.org/">http://www.megastroke.org/</a>             |
| LAS     | MEGASTROKE                     | 6688   | 454 450   |                                                                                                                                                               |                                                                                 |
| CES     | MEGASTROKE                     | 11 710 | 454 450   |                                                                                                                                                               |                                                                                 |
| SVS     | MEGASTROKE                     | 9006   | 454 450   |                                                                                                                                                               |                                                                                 |

AF indicates atrial fibrillation; AIS, any ischemic stroke; CAD, coronary artery disease; CES, cardioembolic stroke; LAS, large artery stroke; SVS, small vessel stroke.

**Supplementary Table 3. Definitions and sources of information for cardiovascular disease outcomes in UK Biobank**

| Outcome                     | Number of cases | ICD-9 diagnosis                                                             | ICD-10 diagnosis              | OPCS procedure | Self-report† |
|-----------------------------|-----------------|-----------------------------------------------------------------------------|-------------------------------|----------------|--------------|
| Heart failure               | 6712            | 402.01, 402.11, 402.91, 404.01, 404.11, 404.91, 404.03, 404.13, 404.93, 428 | I11.0, I13.0, I13.2, I50      |                | 20002        |
| Aortic valve stenosis       | 2244            |                                                                             | I35.0, I35.2                  |                | 20002        |
| Abdominal aneurysm          | 1094            | 441.3, 441.4                                                                | I71.3, I71.4                  | L19.4, L19.5   | 20002        |
| Thoracic aneurysm           | 347             | 441.1, 441.2                                                                | I71.1, I71.2                  |                | 20002        |
| Transient ischemic attack   | 3962            | 435                                                                         | G45                           |                | 20002        |
| Intracerebral hemorrhage    | 1064            | 431                                                                         | I61                           |                | 20002        |
| Subarachnoid hemorrhage     | 1084            | 430                                                                         | I60                           |                | 20002        |
| Venous thromboembolism      | 15602           | 415.1, 451.1, 452, 453.0, 453.4, 453.9                                      | I26, I80.1, I80.2, I81, I82.0 | L90.2          | 20002, 6152  |
| Peripheral arterial disease | 3415            | 443.8, 443.9                                                                | I73.8, I73.9                  |                | 20002        |

ICD, International Classification of Disease; OPCS, Office of Population Censuses and Surveys Classification of Surgical Operations and Procedures.

Follow-up for incident cases was until March 31, 2017 and date of death was recorded until February 14, 2018.

†Numbers refer to data codes used in UK Biobank: 6150/6152 = Health condition diagnosed by doctor (self-reported); 6177 = Medication for health condition (self-reported); 20002 = Non-cancer illness code (self-reported from interview with nurse); 20004 = Surgical operation code (self-reported from interview with nurse).

**Supplementary Table 4. Single-nucleotide polymorphisms selected as instrumental variables for individual FAs**

| Type of FA | FA   | SD <sup>a</sup> | SNP        | Chr          | Nearby gene           | EA       | % variance explained | Summary statistics for SNP-FA association |           |           |
|------------|------|-----------------|------------|--------------|-----------------------|----------|----------------------|-------------------------------------------|-----------|-----------|
|            |      |                 |            |              |                       |          |                      | Beta <sup>b</sup>                         | SE        | P         |
| n-3 PUFA   | ALA  | 0.05            | rs174547   | 11           | <i>FADS1</i>          | C        | 1                    | 0.02                                      | 0.001     | 3.50E-64  |
|            | EPA  | 0.3             | rs3798713  | 6            | <i>ELOVL2</i>         | C        | 0.4                  | 0.04                                      | 0.005     | 1.90E-12  |
|            |      |                 | rs174538   | 11           | <i>FADS1/C11orf10</i> | G        | 1.7                  | 0.08                                      | 0.005     | 5.40E-58  |
|            | DPA  | 0.17            | rs780094*  | 2            | <i>GCKR</i>           | T        | 0.5                  | 0.02                                      | 0.003     | 9.00E-09  |
|            |      |                 | rs3734398  | 6            | <i>ELOVL2</i>         | C        | 2.7                  | 0.04                                      | 0.003     | 9.70E-43  |
| DHA        | 0.89 | rs174547        | 11         | <i>FADS1</i> | T                     | 8.4      | 0.08                 | 0.003                                     | 3.80E-154 |           |
| n-6 PUFA   | LA   | 2.69            | rs2236212  | 6            | <i>ELOVL2</i>         | G        | 0.7                  | 0.11                                      | 0.014     | 1.30E-15  |
|            |      |                 | rs10740118 | 10           | <i>JMJD1C</i>         | G        | 0.2-0.7              | 0.25                                      | 0.050     | 8.10E-09  |
|            |      |                 | rs174547   | 11           | <i>FADS1</i>          | C        | 7.6-18.1             | 1.47                                      | 0.050     | 5.00E-274 |
|            | AA   | 1.96            | rs16966952 | 16           | <i>NTANI</i>          | G        | 0.5-2.5              | 0.35                                      | 0.040     | 1.20E-15  |
| rs174547   |      |                 | 11         | <i>FADS1</i> | T                     | 3.7-37.6 | 1.69                 | 0.020                                     | 3.3E-971  |           |
| n-7 MUFA   | POA  | 0.18            | rs16966952 | 16           | <i>NTANI</i>          | G        | 0.1-0.6              | 0.20                                      | 0.030     | 2.40E-10  |
|            |      |                 | rs780093*  | 2            | <i>GCKR</i>           | T        | 0.2-0.9              | 0.02                                      | 0.003     | 9.80E-10  |
|            |      |                 | rs6722456  | 2            | <i>RN7SKP93</i>       | G        | 0.01-0.6             | 0.05                                      | 0.009     | 4.10E-08  |
|            |      |                 | rs603424   | 10           | <i>SCD/PKD2L1</i>     | G        | 0.3-1.6              | 0.03                                      | 0.004     | 5.70E-15  |
|            |      |                 | rs11190604 | 10           | <i>HIF1AN</i>         | G        | 0.02-0.7             | 0.02                                      | 0.004     | 5.70E-09  |
| n-9 MUFA   | OA   | 1.17            | rs102275   | 11           | <i>FADS1/2</i>        | C        | 0.15-1.0             | 0.02                                      | 0.003     | 6.60E-13  |
|            |      |                 | rs102275   | 11           | <i>FADS1/2</i>        | C        | 0.3-2.1              | 0.23                                      | 0.020     | 2.20E-32  |
| SFA        | PA   | 1.64            | rs2391388  | 1            | <i>ALG14</i>          | C        | 0.2-1.0              | 0.18                                      | 0.030     | 2.70E-11  |
|            | SA   | 1.19            | rs6675668  | 1            | <i>ALG14</i>          | G        | 0.4-1.4              | 0.17                                      | 0.020     | 2.20E-18  |
|            |      |                 | rs11119805 | 1            | <i>LPGATI</i>         | T        | 0.01-0.7             | 0.17                                      | 0.030     | 2.80E-09  |
|            |      |                 | rs102275   | 11           | <i>FADS1/2</i>        | T        | 0.3-1.2              | 0.18                                      | 0.020     | 1.30E-20  |

AA indicates arachidonic acid; ALA,  $\alpha$ -linolenic acid; Chr, chromosome; DHA, docosahexaenoic acid; DPA, docosapentaenoic acid; EA, effect allele; EAF, effect allele frequency; EPA, eicosapentaenoic acid; FA, fatty acid; LA, linoleic acid; LAS, larger artery stroke; MUFA, monounsaturated fatty acid; OA, oleic

acid; PA, palmitic acid; POA, palmitoleic acid; PUFA, polyunsaturated fatty acid; SA, stearic acid; SD, standard deviation; SE, standard error; SFA, saturated fatty acid; SNP, single-nucleotide polymorphisms.

<sup>a</sup> The unit for SD is the percentage of total FAs.

<sup>b</sup> The beta coefficients represent the change in percentage of total fatty acids for each additional effect allele.

\*SNPs in *GCKR* gene were excluded from all analyses due to multiple pleiotropic associations with potential confounders.

**Supplementary Table 5. Related traits of the single-nucleotide polymorphisms associated with plasma fatty acid levels from PhenoScanner search**

| FA  | SNP        | EA | Nearby gene           | Related trait               | Beta  | P         | Related trait               | Beta  | P        | Related trait             | Beta | P        |
|-----|------------|----|-----------------------|-----------------------------|-------|-----------|-----------------------------|-------|----------|---------------------------|------|----------|
| ALA | rs174547   | C  | <i>FADS1</i>          | Triglycerides               | 0.05  | 1.04E-40  | Red cell distribution width | -0.05 | 6.77E-40 | Low density lipoprotein   | -    | 7.99E-38 |
| EPA | rs174538   | G  | <i>FADS1/C11orf10</i> | Red cell distribution width | 0.05  | 1.55E-43  | Low density lipoprotein     | 0.05  | 1.07E-34 | Pulse rate                | -    | 2.34E-32 |
| DPA | rs780094   | T  | <i>GCKR</i>           | Triglycerides               | 0.11  | 2.65E-220 | Total cholesterol           | 0.05  | 5.28E-41 | Alcohol intake frequency  | 0.05 | 1.13E-39 |
| DPA | rs174547   | T  | <i>FADS1</i>          | Triglycerides               | 0.05  | 1.04E-40  | Red cell distribution width | -0.05 | 6.77E-40 | Low density lipoprotein   | -    | 7.99E-38 |
| LA  | rs10740118 | G  | <i>JMJD1C</i>         | Mean platelet volume        | 0.13  | 7.26E-286 | Platelet count              | -0.08 | 2.51E-95 | Triglycerides             | 0.03 | 1.81E-11 |
| LA  | rs174547   | C  | <i>FADS1</i>          | Triglycerides               | 0.05  | 1.04E-40  | Red cell distribution width | -0.05 | 6.77E-40 | Low density lipoprotein   | -    | 7.99E-38 |
| LA  | rs16966952 | G  | <i>NTAN1</i>          | Whole body fat-free mass    | 0.01  | 3.67E-11  | Basal metabolic rate        | 0.01  | 9.52E-11 | Height                    | 0.01 | 2.00E-10 |
| AA  | rs174547   | T  | <i>FADS1</i>          | Triglycerides               | 0.05  | 1.04E-40  | Red cell distribution width | -0.05 | 6.77E-40 | Low density lipoprotein   | -    | 7.99E-38 |
| AA  | rs16966952 | G  | <i>NTAN1</i>          | Whole body fat-free mass    | 0.01  | 3.67E-11  | Basal metabolic rate        | 0.01  | 9.52E-11 | Height                    | 0.01 | 2.00E-10 |
| POA | rs780093   | T  | <i>GCKR</i>           | Triglycerides               | 0.11  | 2.65E-220 | Total cholesterol           | 0.05  | 5.28E-41 | Alcohol intake frequency  | 0.05 | 1.13E-39 |
| POA | rs603424   | G  | <i>SCD/PKD2L1</i>     | Blood metabolite ratios     | -0.05 | 1.00E-115 | Mean platelet volume        | 0.06  | 4.56E-31 | Heel bone mineral density | 0.03 | 3.77E-12 |
| POA | rs11190604 | G  | <i>HIF1AN</i>         | Leg predicted mass left     | -0.01 | 4.16E-11  | Whole body fat-free mass    | -0.01 | 7.48E-10 | Height                    | -    | 9.60E-10 |
| POA | rs102275   | C  | <i>FADS1/2</i>        | Red cell distribution width | -0.05 | 4.49E-41  | Triglycerides               | 0.05  | 4.27E-40 | Low density lipoprotein   | -    | 7.61E-40 |
| OA  | rs102275   | C  | <i>FADS1/2</i>        | Red cell distribution width | -0.05 | 4.49E-41  | Triglycerides               | 0.05  | 4.27E-40 | Low density lipoprotein   | -    | 7.61E-40 |
| SA  | rs102275   | T  | <i>FADS1/2</i>        | Red cell distribution width | -0.05 | 4.49E-41  | Triglycerides               | 0.05  | 4.27E-40 | Low density lipoprotein   | -    | 7.61E-40 |

**Supplementary Table 5 (cont.). Related traits of the single-nucleotide polymorphisms associated with plasma fatty acid levels from PhenoScanner search**

| FA  | SNP        | EA | Nearby gene           | Related trait                         | Beta  | P        | Related trait                  | Beta  | P        | Related trait                      | Beta  | P        |
|-----|------------|----|-----------------------|---------------------------------------|-------|----------|--------------------------------|-------|----------|------------------------------------|-------|----------|
| ALA | rs174547   | C  | <i>FADS1</i>          | Pulse rate                            | 0.03  | 8.59E-38 | Total cholesterol              | -0.05 | 1.35E-35 | Mean platelet volume               | -0.04 | 1.14E-24 |
| EPA | rs174538   | G  | <i>FADS1/C11orf10</i> | Mean platelet volume                  | 0.04  | 1.72E-24 | Triglycerides                  | -0.04 | 1.47E-19 | Height                             | 0.01  | 2.63E-12 |
| DPA | rs780094   | T  | <i>GCKR</i>           | Fat-free mass                         | -0.02 | 4.92E-39 | Serum urate                    | 0.08  | 6.52E-39 | Monocyte percentage of white cells | -0.04 | 4.02E-34 |
| DPA | rs174547   | T  | <i>FADS1</i>          | Pulse rate                            | 0.03  | 8.59E-38 | Total cholesterol              | -0.05 | 1.35E-35 | Mean platelet volume               | -0.04 | 1.14E-24 |
| LA  | rs10740118 | G  | <i>JMJD1C</i>         | Average weekly beer plus cider intake | 0.01  | 2.28E-09 | Body mass index                | 0.01  | 1.05E-08 | Years of educational attainment    | -0.01 | 1.36E-08 |
| LA  | rs174547   | C  | <i>FADS1</i>          | Pulse rate                            | 0.03  | 8.59E-38 | Total cholesterol              | -0.05 | 1.35E-35 | Mean platelet volume               | -0.04 | 1.14E-24 |
| LA  | rs16966952 | G  | <i>NTAN1</i>          | Weight                                | 0.01  | 3.50E-08 | Leg fat-free mass left         | 0.01  | 2.35E-10 | NA                                 | NA    | NA       |
| AA  | rs174547   | T  | <i>FADS1</i>          | Pulse rate                            | 0.03  | 8.59E-38 | Total cholesterol              | -0.05 | 1.35E-35 | Mean platelet volume               | -0.04 | 1.14E-24 |
| AA  | rs16966952 | G  | <i>NTAN1</i>          | Weight                                | 0.01  | 3.50E-08 | Leg fat-free mass left         | 0.01  | 2.35E-10 | NA                                 | NA    | NA       |
| POA | rs780093   | T  | <i>GCKR</i>           | Fat-free mass                         | -0.02 | 4.92E-39 | Serum urate                    | 0.08  | 6.52E-39 | Monocyte percentage of white cells | -0.04 | 4.02E-34 |
| POA | rs603424   | G  | <i>SCD/PKD2L1</i>     | Impedance of arm left                 | 0.02  | 4.35E-12 | Self-reported high cholesterol | -0.01 | 5.28E-08 | NA                                 | NA    | NA       |
| POA | rs11190604 | G  | <i>HIF1AN</i>         | Basal metabolic rate                  | -0.01 | 1.09E-09 | NA                             | NA    | NA       | NA                                 | NA    | NA       |
| POA | rs102275   | C  | <i>FADS1/2</i>        | Pulse rate                            | 0.03  | 9.80E-37 | High density lipoprotein       | -0.04 | 6.40E-28 | Triglycerides                      | 0.05  | 1.58E-23 |
| OA  | rs102275   | C  | <i>FADS1/2</i>        | Pulse rate                            | 0.03  | 9.80E-37 | High density lipoprotein       | -0.04 | 6.40E-28 | Triglycerides                      | 0.05  | 1.58E-23 |
| SA  | rs102275   | T  | <i>FADS1/2</i>        | Pulse rate                            | 0.03  | 9.80E-37 | High density lipoprotein       | -0.04 | 6.40E-28 | Triglycerides                      | 0.05  | 1.58E-23 |

**Supplementary Table 5 (continue). Related traits of the single-nucleotide polymorphisms associated with plasma fatty acid levels from PhenoScanner search**

| FA  | SNP        | EA | Nearby gene           | Beta  | P        | Related trait   | Beta  | P        |
|-----|------------|----|-----------------------|-------|----------|-----------------|-------|----------|
| ALA | rs174547   | C  | <i>FADS1</i>          | -0.02 | 2.10E-08 | Wine intake     | 0.01  | 2.62E-08 |
| EPA | rs174538   | G  | <i>FADS1/C11orf10</i> | -0.01 | 3.49E-08 | NA              | NA    | NA       |
| DPA | rs780094   | T  | <i>GCKR</i>           | 0.03  | 6.81E-27 | Height          | -0.02 | 1.91E-19 |
| DPA | rs174547   | T  | <i>FADS1</i>          | -0.02 | 2.10E-08 | Wine intake     | 0.01  | 2.62E-08 |
| LA  | rs10740118 | G  | <i>JMJD1C</i>         | -0.01 | 6.49E-08 | Sodium in urine | 0.01  | 2.52E-07 |
| LA  | rs174547   | C  | <i>FADS1</i>          | -0.02 | 2.10E-08 | Wine intake     | 0.01  | 2.62E-08 |
| AA  | rs174547   | T  | <i>FADS1</i>          | -0.02 | 2.10E-08 | Wine intake     | 0.01  | 2.62E-08 |
| POA | rs780093   | T  | <i>GCKR</i>           | 0.03  | 6.81E-27 | Height          | -0.02 | 1.91E-19 |
| POA | rs102275   | C  | <i>FADS1/2</i>        | -0.02 | 4.97E-17 | Height          | -0.01 | 1.89E-11 |
| OA  | rs102275   | C  | <i>FADS1/2</i>        | -0.02 | 4.97E-17 | Height          | -0.01 | 1.89E-11 |
| SA  | rs102275   | T  | <i>FADS1/2</i>        | -0.02 | 4.97E-17 | Height          | -0.01 | 1.89E-11 |

EA indicates effect allele; FAs, fatty acids; NA, not available; SNP, single-nucleotide polymorphisms.

Web of PhenoScanner V2: <http://www.phenoscaner.medschl.cam.ac.uk/>
